# Supplementary material for: Lipid Droplets in Brown Adipose Tissue Are Dispensable for Cold-Induced Thermogenesis
Source: PubMed Central journal article supplement — Cell Rep. Author manuscript; Available in PMC 2020 Nov 28. (PMC7696656; doi:10.1016/j.celrep.2020.108348), 2020-11-03
Supplement: NIHMS1643886-supplement-1.pdf [file NIHMS1643886-supplement-1.pdf]

**Cell Reports, Volume 33**

**Supplemental Information**

**Lipid Droplets in Brown Adipose Tissue**

**Are Dispensable for Cold-Induced Thermogenesis**

**Chandramohan Chitraju, Alexander W. Fischer, Robert V. Farese Jr., and Tobias C. Walther**

## Supplementary Figure 1

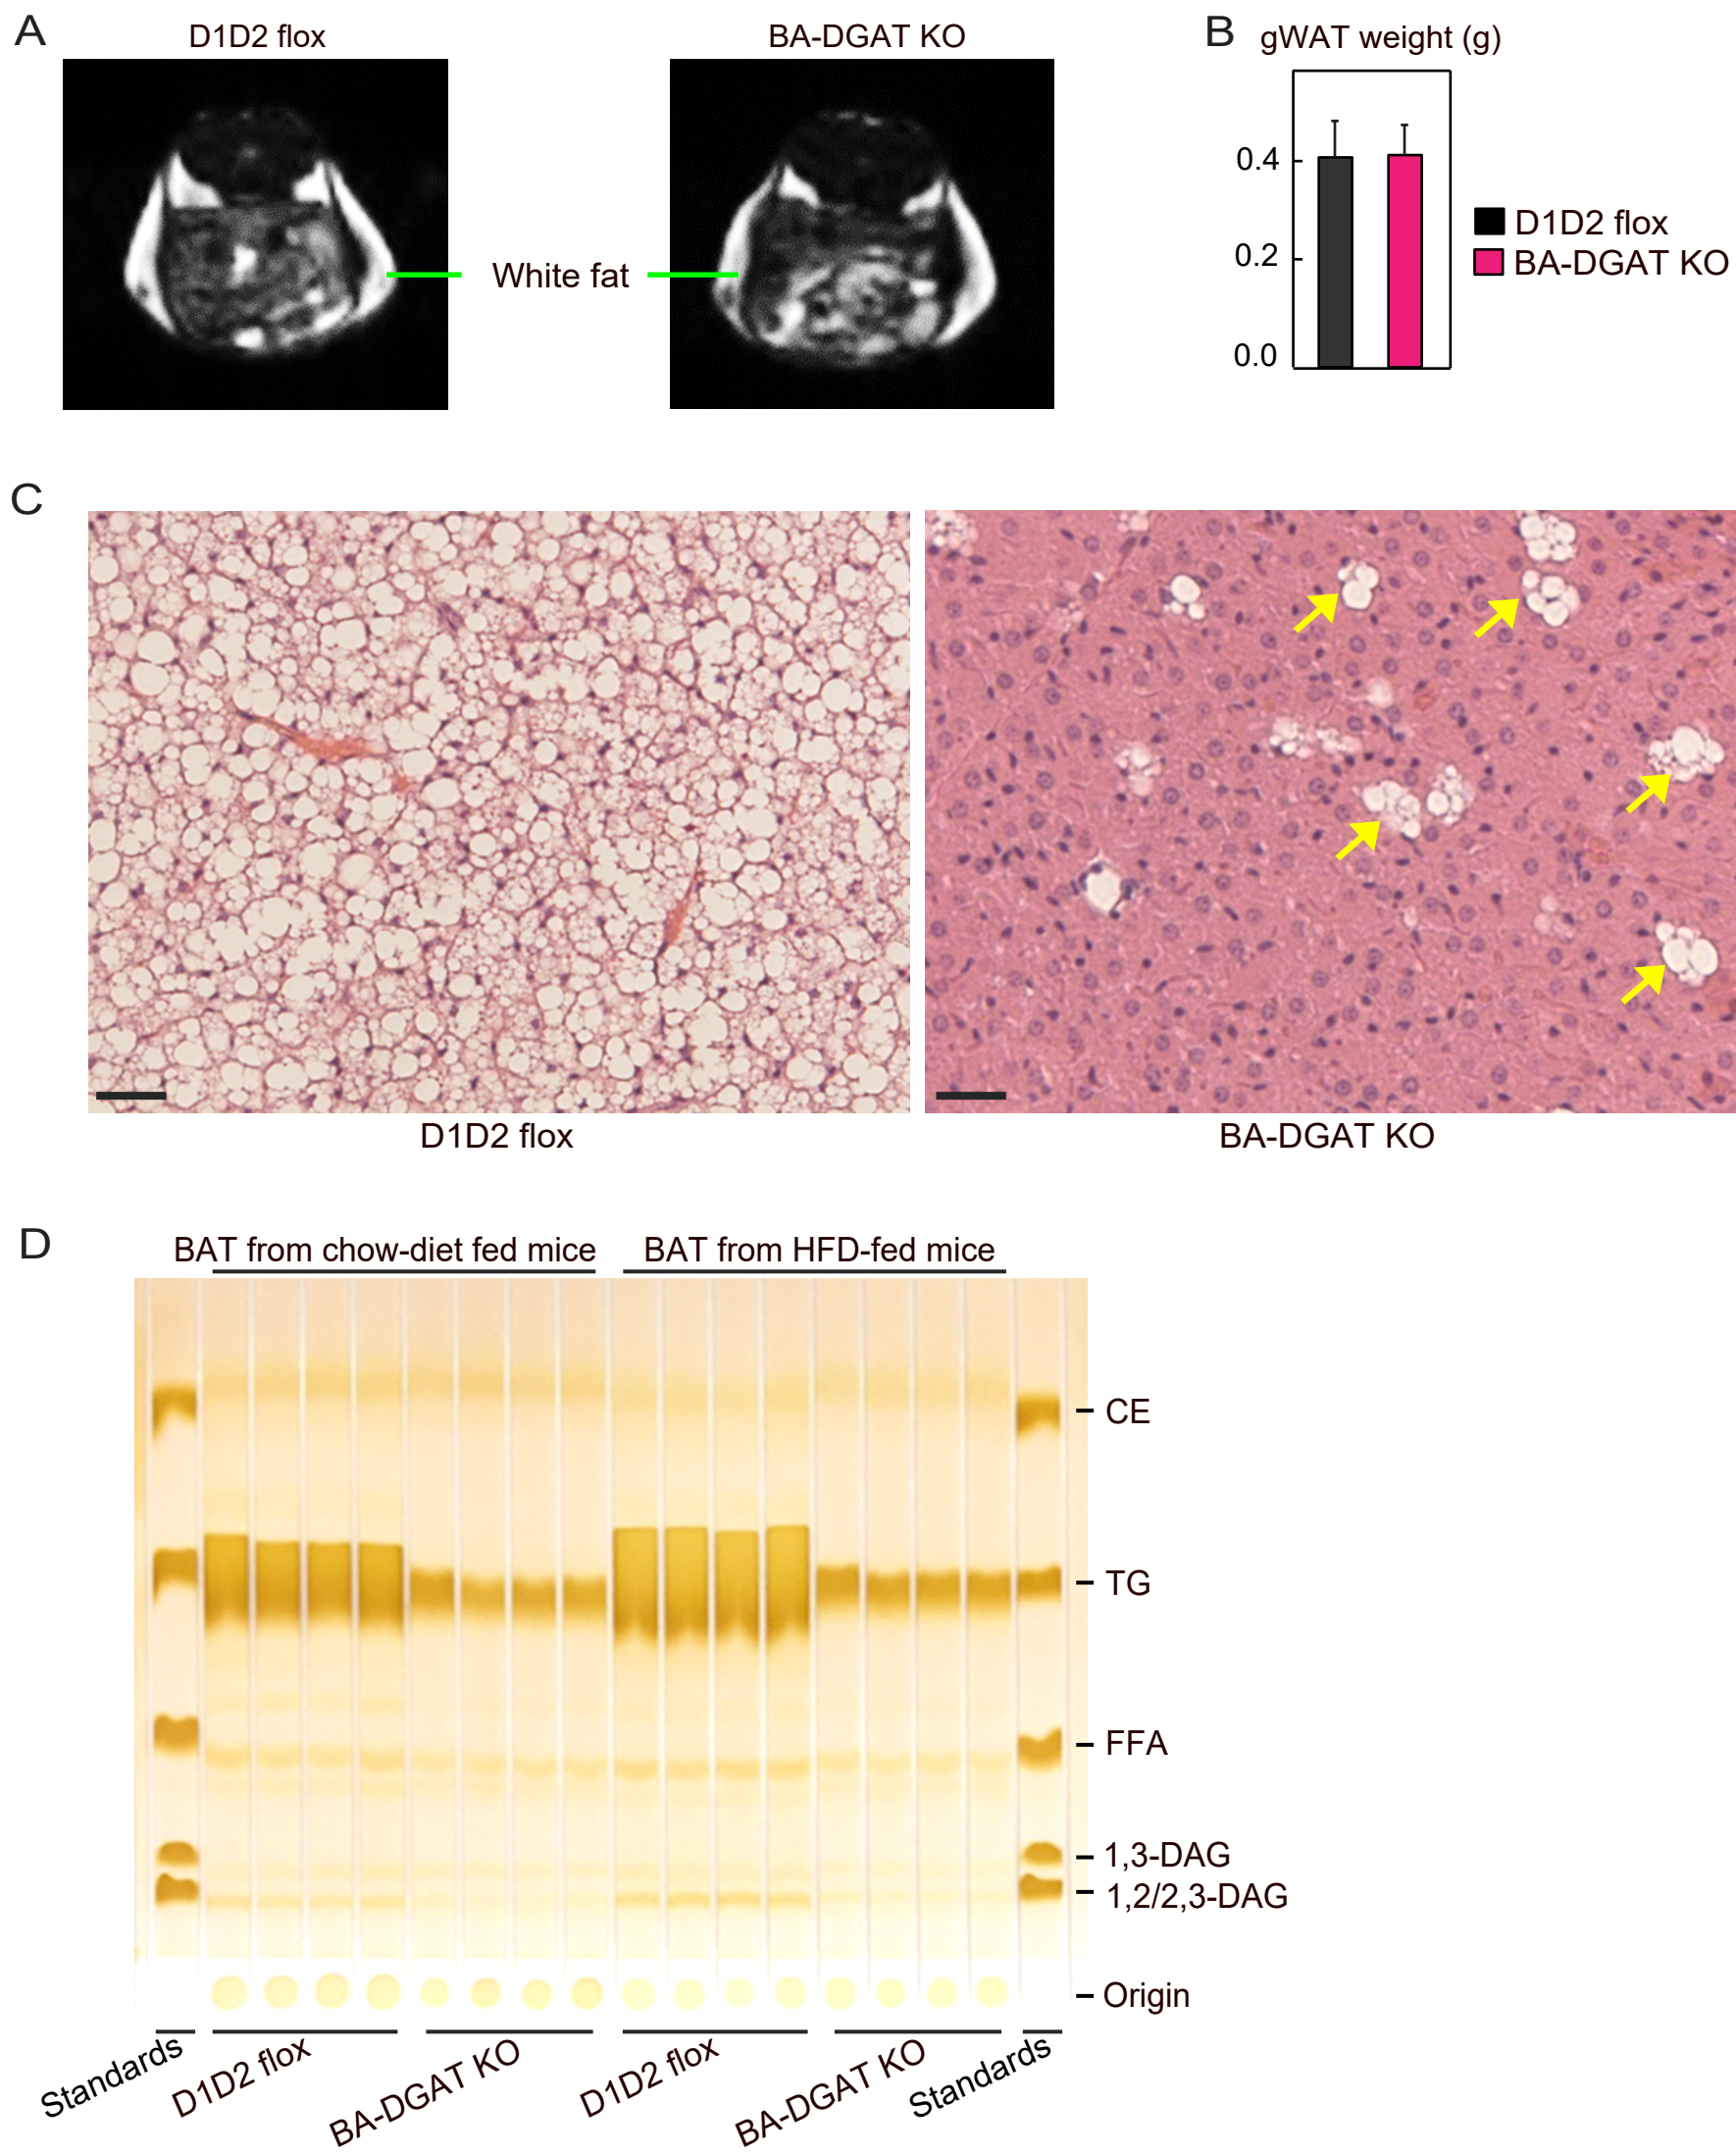

**Figure S1. Related to Figure 1. Fat mass Analysis of BA-DGAT KO Mice and Thin Layer Chromatography Analysis of Neutral Lipids from BAT.**

(A) Nuclear magnetic resonance imaging (MRI) scans of D1D2 flox and BA-DGAT KO mice (n=3).

(B) Weights of gonadal fat depots from chow-diet-fed mice (n=6).

(C) H&E-stained sections of BAT. LDs were absent in nearly all cells of BAT depots in BA-DGAT KO mice. A few cells of unknown identity (arrow heads) in BAT of BA-DGAT KO mice still had LDs. Scale bars, 50  $\mu$ m.

(D) Thinlayer chromatography analysis of neutral lipids extracted from BAT. Triglycerides present in BAT of BA-DGAT KO mice account for few cells of unknown identity that still had LDs. CE, cholesterol esters; TG, triglycerides; FFA, free fatty acids; DAG, diacyl glycerol. (n=4). Lipids loaded onto TLC were normalized to proteins.

Data are presented as mean  $\pm$  SD. \*\*\*p<0.001 by t-test.

Supplementary Figure 2

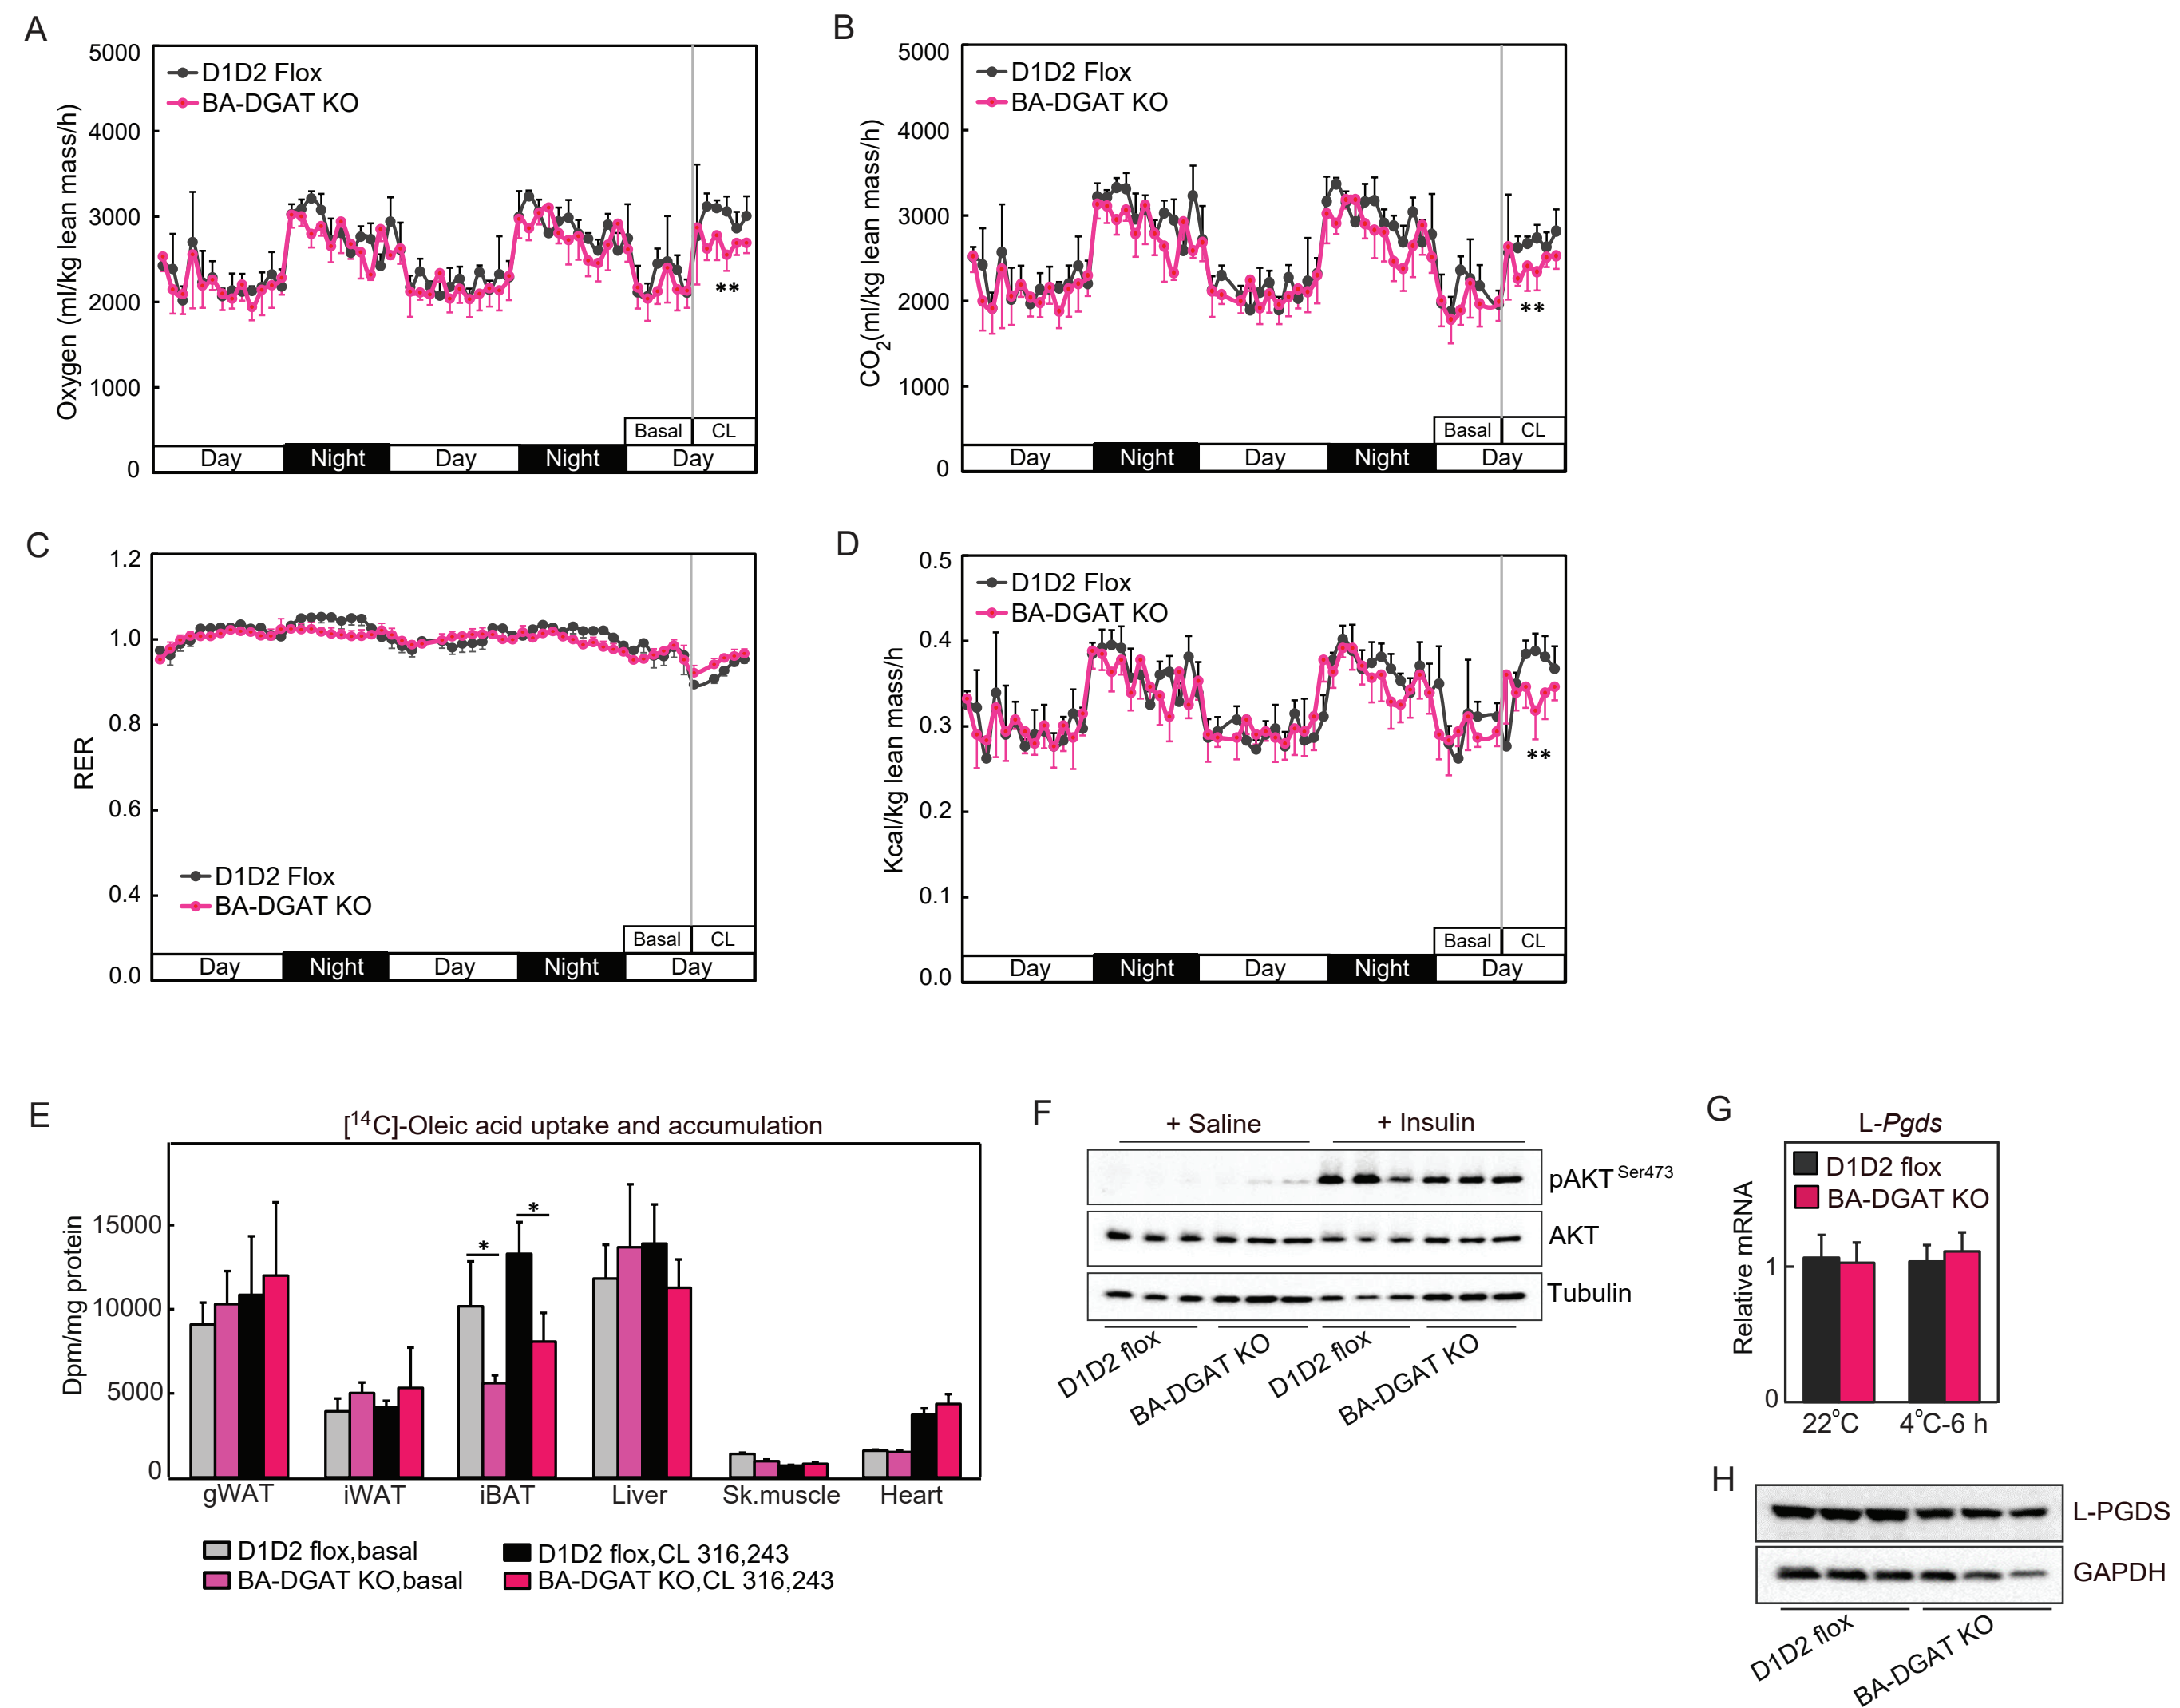

**Figure S2. Related to Figures 2 and 3. Analysis of Insulin signalling in BAT and Indirect calorimetry analysis of BA-DGAT KO mice.**

(A-D) Oxygen consumption, carbon dioxide release, energy expenditure and RER in basal or CL 316,243-administered mice. Each data point represents the mean of six readings per hour (n=4).

(E) [14C]-oleic acid uptake by tissues in basal or in CL 316,243-administered mice (n=3).

(F) Western blot analysis of insulin signaling in BAT of basal or insulin-administered mice (n=3).

(G) mRNA levels of *L-Pgds* in BAT of mice housed at room temperature (22°C) or cold exposed for 6 hours (4°C-6h) (n=6).

(H) Immunoblot analysis of L-PGDS in BAT of mice housed at room temperature (n=3).

Data are presented as mean ± SD. \*p<0.05, \*\*p<0.01.



**Supplementary Figure 3**

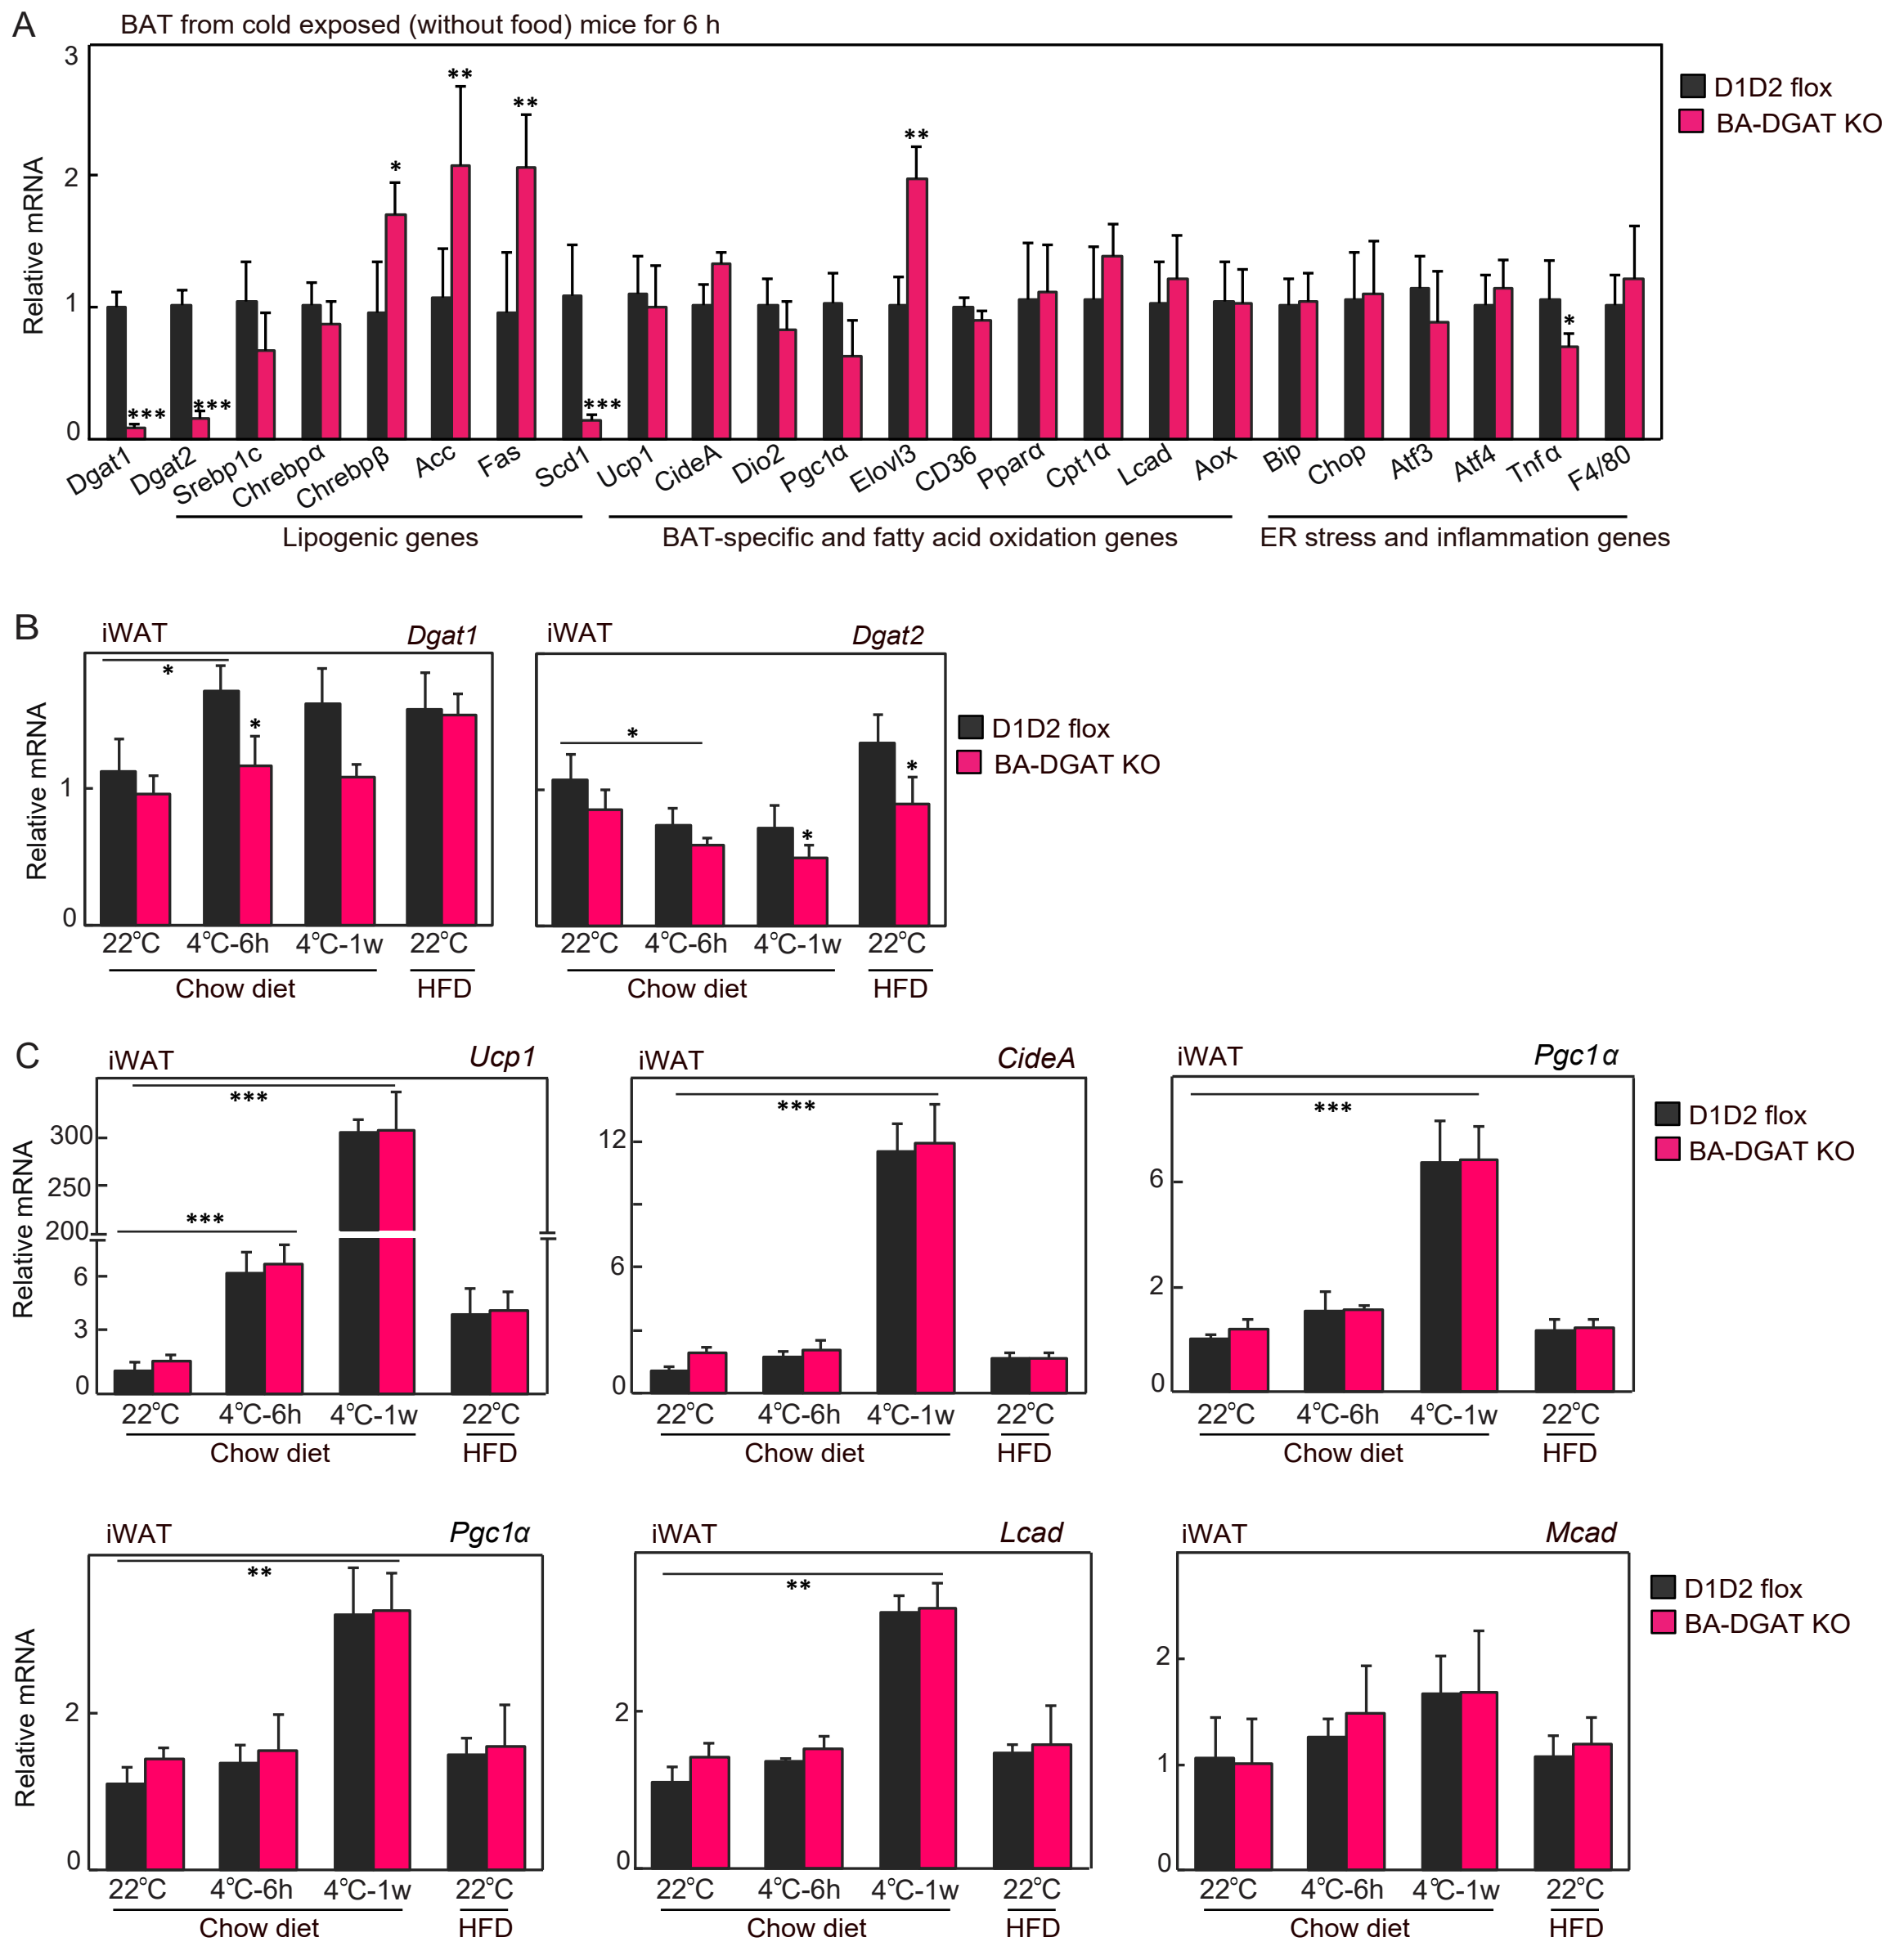

**Figure S3. Related to Figure 3. Quantitative Real-Time PCR Analysis of genes in BAT and iWAT.**

(A) mRNA levels in BAT of cold exposed (without food) mice for 6 hours (n=6).

(B) *Dgat1* and *Dgat2* mRNA levels in iWAT of acutely or chronically cold exposed or high-fat-diet fed mice (n=6).

(C) mRNA levels of thermogenic genes in iWAT of acutely or chronically cold exposed or high-fat-diet fed mice (n=6).

Data are presented as mean  $\pm$  SD. \* $p < 0.05$ , \*\* $p < 0.01$ , \*\*\* $p < 0.001$ .

## Supplementary Figure 4

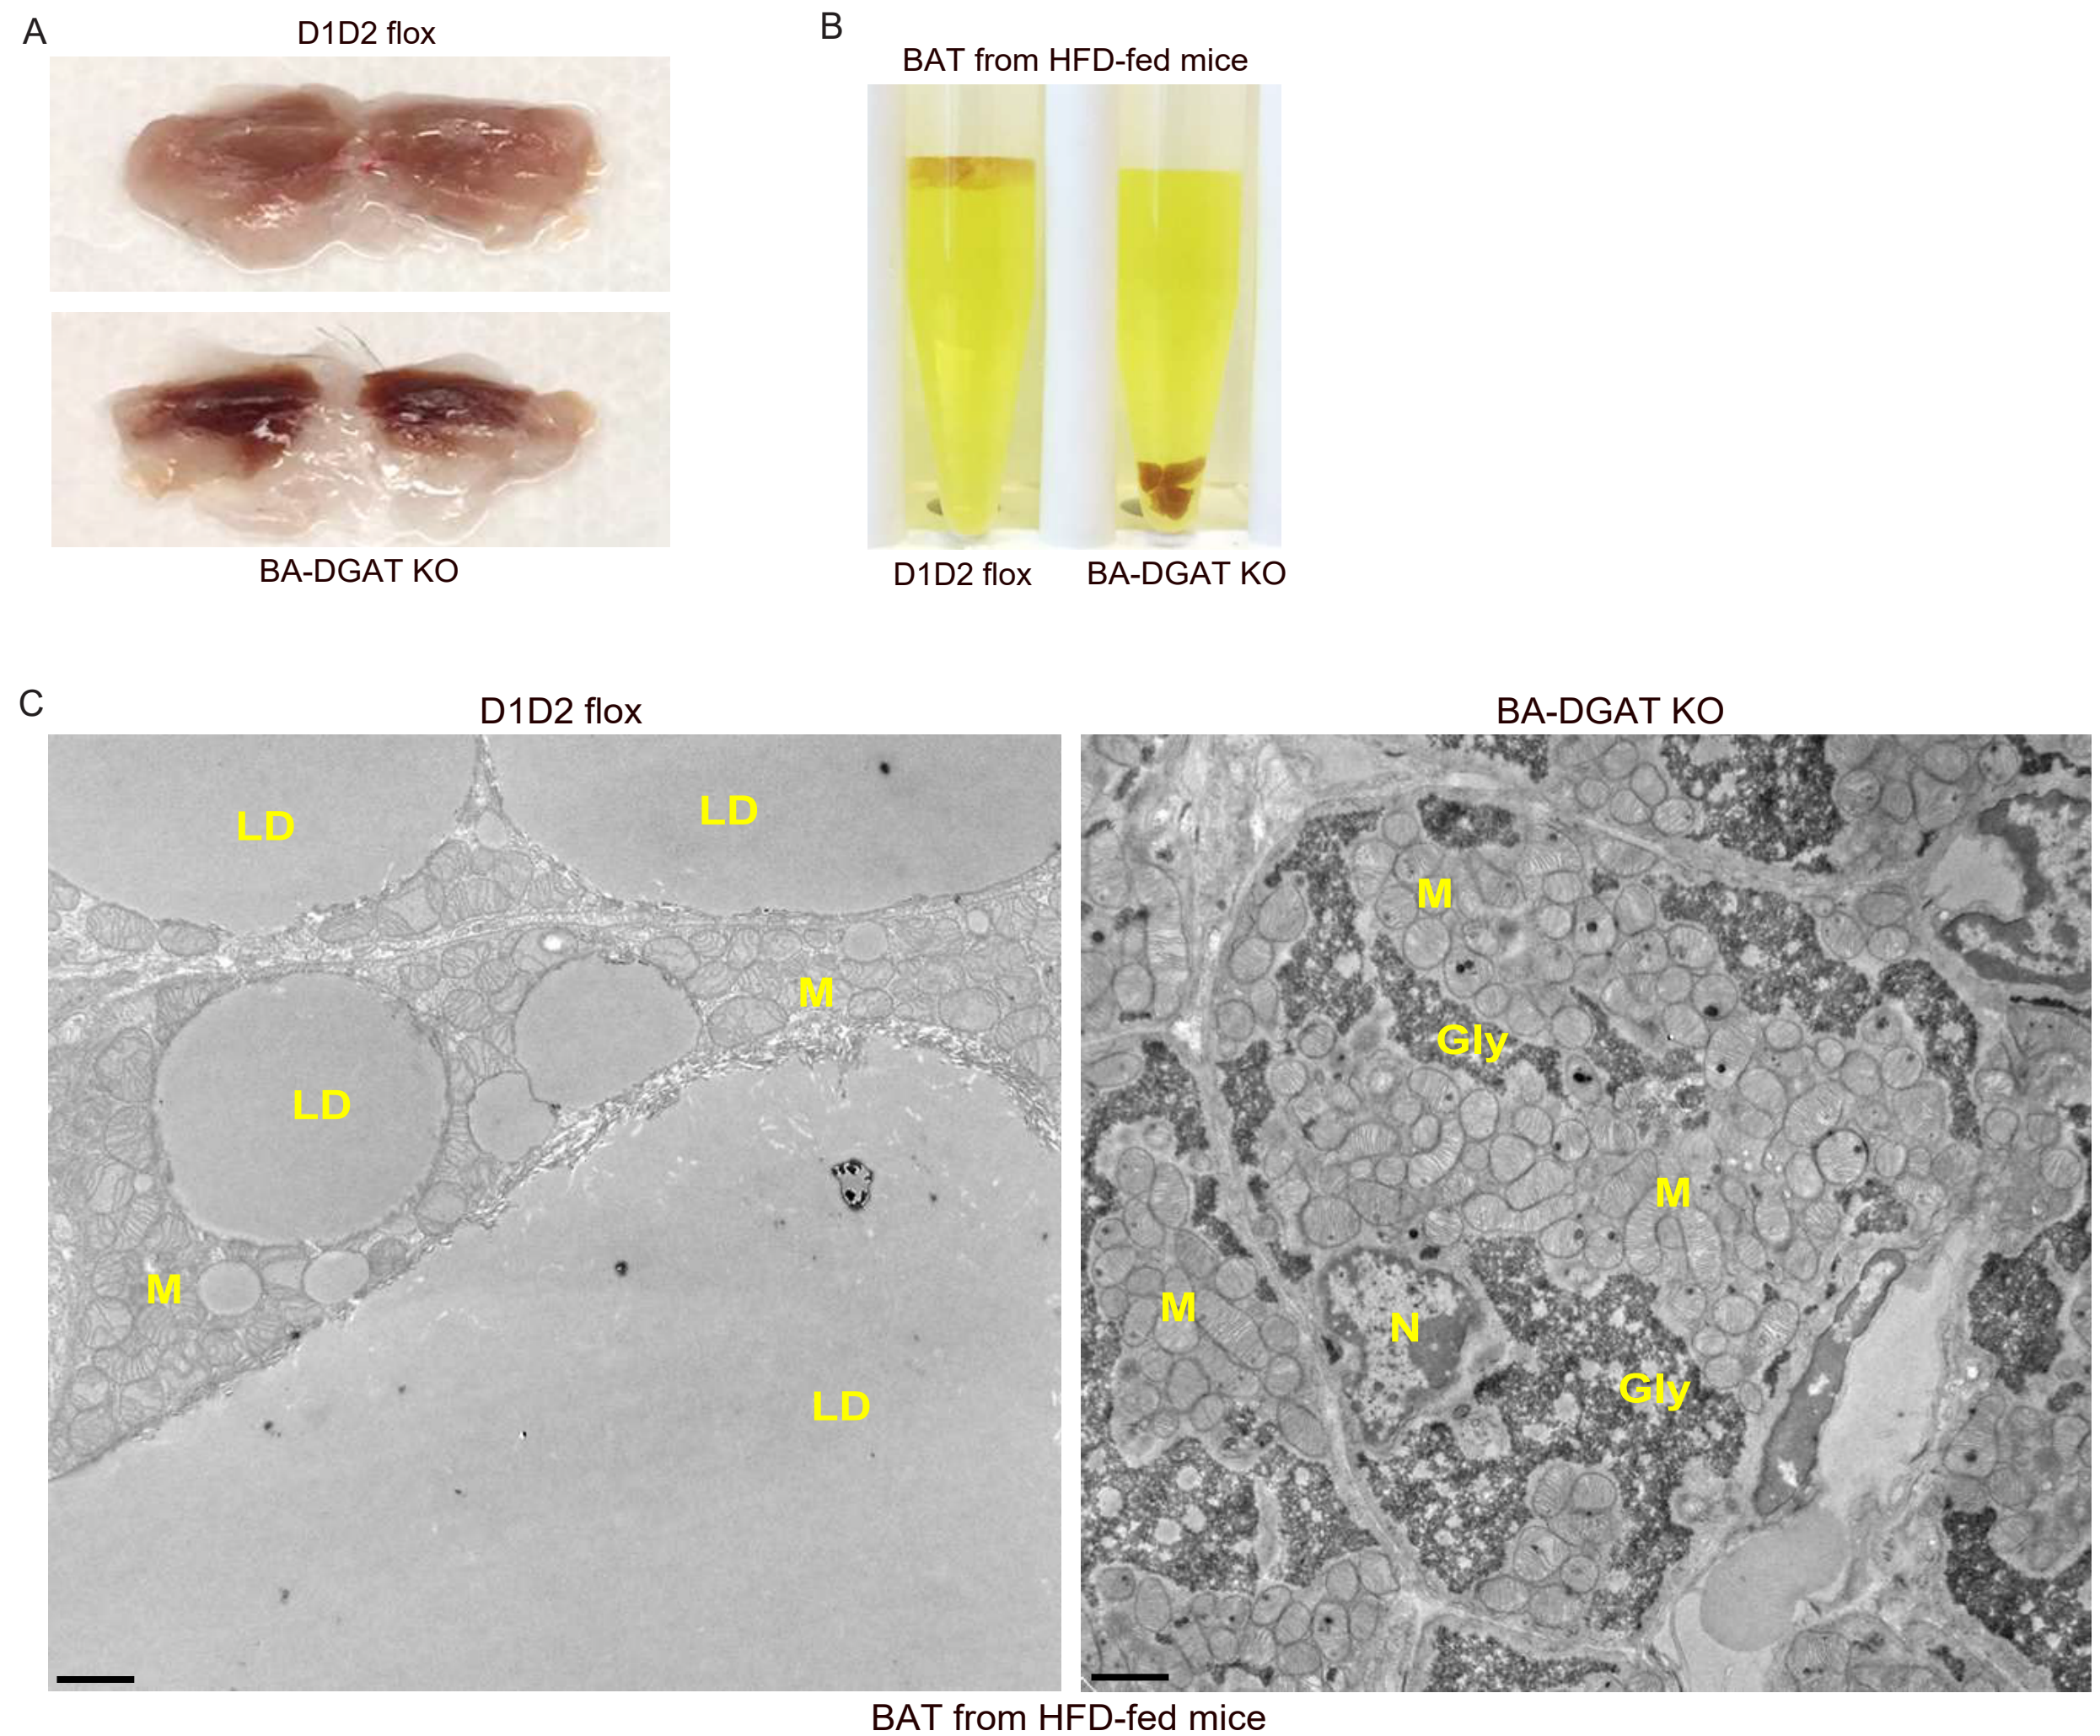

**Figure S4. Related to Figure 4. Gross Appearance of BAT and TEM images of BAT from HFD-fed mice.**

(A) Gross appearance of BAT from 12 weeks HFD-fed mice.

(B) BAT of HFD-fed BA-DGAT KO mice sinks in an aqueous buffer with fixative (1.25% formaldehyde, 2.5 % glutaraldehyde and 0.03% picric acid in 0.1 M sodium cacodylate buffer, pH 7.4, density of the fixative is 1.01 g/ml) used to fix BAT tissue for electron microscopy.

(C) TEM images of BAT from 12 weeks HFD-fed mice; scale bars, 2  $\mu$ m. LD, lipid droplet; M, mitochondria; N, nucleus; Gly, glycogen.

### Supplementary Table S1. Related to Figure 1

Plasma metabolites from *ad libitum* chow diet fed mice

| Plasma metabolites         | D1D2 flox   | BA-DGAT KO  |
|----------------------------|-------------|-------------|
| Glucose (mg/dl)            | 158 ± 9.5   | 146 ± 8.5*  |
| Free fatty acids (m mol/l) | 0.42 ± 0.09 | 0.41 ± 0.07 |
| Free glycerol (m mol/l)    | 0.17 ± 0.06 | 0.19 ± 0.03 |
| Triglycerides (mg/dl)      | 41 ± 8.8    | 31 ± 4.5*   |
| Total cholesterol (mg/dl)  | 88 ± 18     | 77 ± 10     |
| Insulin (ng/ml)            | 0.61 ± 0.07 | 0.59 ± 0.05 |

(n=8-11 mice) values are mean ± SD. \*p<0.05

## Supplementary Table S2. Related to STAR Method RNA Extraction and Quantitative Real-Time PCR

Primers used for quantitative Real-Time PCR analysis of mouse genes

| Gene                     | Primer sequence (5'-3')                                         |
|--------------------------|-----------------------------------------------------------------|
| <i>Cyclophilin</i>       | Fwd: GGAGATGGCACAGGAGGAAA<br>Rev: CCGTAGTGCTTCAGTTTGAAGTTCT     |
| <i>Dgat1</i>             | Fwd: GGAATATCCCCGTGCACAA<br>Rev: CATTGCTGCTGCCATGTC             |
| <i>Dgat2</i>             | Fwd: CCGCAAAGGCTTTGTGAA<br>Rev: GGAATAAGTGGGAACCAGATCAG         |
| <i>Glut1</i>             | Fwd: GGCCAGATTCATCAACTGGAT<br>Rev: GCTCCAAGGCTGTACCCTAAG        |
| <i>Glut4</i>             | Fwd: GTGACTGGAACACTGGTCCTA<br>Rev: CCAGCCAGTTGCATTGTAG          |
| <i>Glycogen synthase</i> | Fwd: GAACGCAGTGCTTTTCGAGG<br>Rev: CCAGATAGTAGTTGTCAACCCAT       |
| <i>Glycogenin</i>        | Fwd: TGGAGTCTTTGTCTATCAACCCT<br>Rev: TTGCCAGCCACTAAAATATGT      |
| <i>Sreb1c</i>            | Fwd: GGAGCCATGGATTGCACATT<br>Rev: GGCCCGGAAGTCACTGT             |
| <i>Chrebpa</i>           | Fwd: CGACACTCACCCACCTCTTC<br>Rev: TTGTTCAGCCGGATCTTGTC          |
| <i>Chrebpβ</i>           | Fwd: TCTGCAGATCGCGTGGAG<br>Rev: CTTGTCCCGGCATAGCAAC             |
| <i>Fas</i>               | Fwd: GGAGGTGGTGATAGCCGGTAT<br>Rev: TGGGTAATCCATAGAGCCCAG        |
| <i>Acc</i>               | Fwd: GATGAACCATCTCCGTTGGC<br>Rev: GACCCAATTATGAATCGGGAGTG       |
| <i>Elovl3</i>            | Fwd: TTCTCACGCGGGTTAAAAATGG<br>Rev: GAGCAACAGATAGACGACCAC       |
| <i>Scd1</i>              | Fwd: TTCTTGCGATACACTCTGGTGC<br>Rev: CGGGATTGAATGTTCTTGTCGT      |
| <i>Ucp1</i>              | Fwd: AGGCTTCCAGTACCATTAGGT<br>Rev: CTGAGTGAGGCAAAGCTGATTT       |
| <i>CideA</i>             | Fwd: TGCTCTTCTGTATCGCCCAGT<br>Rev: GCCGTGTTAAGGAATCTGCTG        |
| <i>Dio2</i>              | Fwd: CAGTGTGGTGCACGTCTCCAATC<br>Rev: TGAACCAAAGTTGACCACCAG      |
| <i>Pgc1α</i>             | Fwd: TTCATCTGAGTATGGAGTCGCT<br>Rev: GGGGGTGAAACCACTTTTGTA       |
| <i>Ppara</i>             | Fwd: AATGCAATTTCGCTTTGGAAG<br>Rev: GGCCTTGACCTTGTTTCATGT        |
| <i>Cpt1α</i>             | Fwd: GAACCCCAACATCCCCAAAC<br>Rev: TCCTGGCATTGTCCTGGAAT          |
| <i>Mcad</i>              | Fwd: AGGTTTCAAGATCGCAATGG<br>Rev: CTCCTTGGTGCTCCACTAGC          |
| <i>Lcad</i>              | Fwd: TCCATGGCAAATACTGGGC<br>Rev: TTGCAATCGGGTACTCCAC            |
| <i>Aox</i>               | Fwd: CTCATCTTCGAGGCTTGAAACCAC<br>Rev: ATTTACGGATAGGGACAAGAAAGGC |
| <i>Cd36</i>              | Fwd: ATGGGCTGTGATCGGAACTG<br>Rev: GTCTTCCAATAAGCATGTCTCC        |
| <i>Bip</i>               | Fwd: ACTTGGGGACCACCTATTCTT<br>Rev: ATCGCCAATCAGACGCTCC          |
| <i>Chop</i>              | Fwd: CCACCACACCTGAAAGCAGAA<br>Rev: AGGTGAAAGGCAGGGACTCA         |
| <i>Atf3</i>              | Fwd: GAGGATTTTGCTAACCTGACACC<br>Rev: TTGACGGTAACTGACTCCAGC      |
| <i>Atf4</i>              | Fwd: CCTTCGACCAGTCGGGTTTG<br>Rev: CTGTCCCGGAAAAGGCATCC          |
| <i>Cd68</i>              | Fwd: TGTCTGATCTTGCTAGGACCG<br>Rev: GAGAGTAACGGCCTTTTGTGA        |
| <i>Tnfa</i>              | Fwd: CCCTCACACTCAGATCATCTTCT<br>Rev: GCTACGACGTGGGCTACAG        |
| <i>F4/80</i>             | Fwd: TGACTCACCTTGTGGTCCTAA<br>Rev: CTTCCAGAATCCAGTCTTTCC        |
| <i>L-Pgds</i>            | Fwd: GACAAGTTTCTGGGGCGCTGGT<br>Rev: GCTGTAGAGGGTGGCCATGCGG      |

Fwd, forward; Rev, reverse.
